# Supplementary material for: Eculizumab for complement mediated thrombotic microangiopathy in sickle cell disease
Source: PubMed Central journal article supplement — Haematologica. 2020 Jul 30;105(12):2887–91. doi: 10.3324/haematol.2020.262006 (PMC7716365; doi:10.3324/haematol.2020.262006), 2020-07-30
Supplement: 2020_262006-Disclosures_Contributions.pdf [file 2020_262006-Disclosures_Contributions.pdf]

Haematologica  
HAEMATOL/2020/262006  
Version 3

Eculizumab for complement mediated thrombotic microangiopathy in  
sickle cell disease

Satheesh Chonat, Sara Graciaa, H. Stella Shin, Joanna G. Newton,  
Maa-Ohui Quarmyne, Jeanne Boudreaux, Amy Tang, Patricia E. Zerra,  
Margo R. Rollins, Cassandra D. Josephson, Clark Brown, Clinton H.  
Joiner, Ross M. Fasano, and Sean R. Stowell

Disclosures: S.C. is a scientific advisor to Alexion and Agios pharmaceuticals. M.R.R. is a scientific advisor to Bluebird Bio. C.D.J. receives research funds from Terumo BCT, Octapharma, and Medtronic. The remaining authors declare no competing financial interests.

Contributions: S.C. collected and analyzed the data and wrote the manuscript. S.G., J.G.N., M.O.Q., J.B., A.T., P.E.Z., M.R., C.D.J. collected and analyzed the data and reviewed the manuscript. H.H.S., C.B., C.H.J., R.M.F. and S.R.S. analyzed the data and provided critical revisions to the manuscript.
